# Supplementary material for: Comparative genomic characterization of multidrug-resistant Citrobacter spp. strains in Fennec fox imported to China
Source: Springer Nature journal article supplement (doi:10.1186/s13099-021-00458-w), 2021-10-13
Supplement: MOESM1 [file 19755446]

A

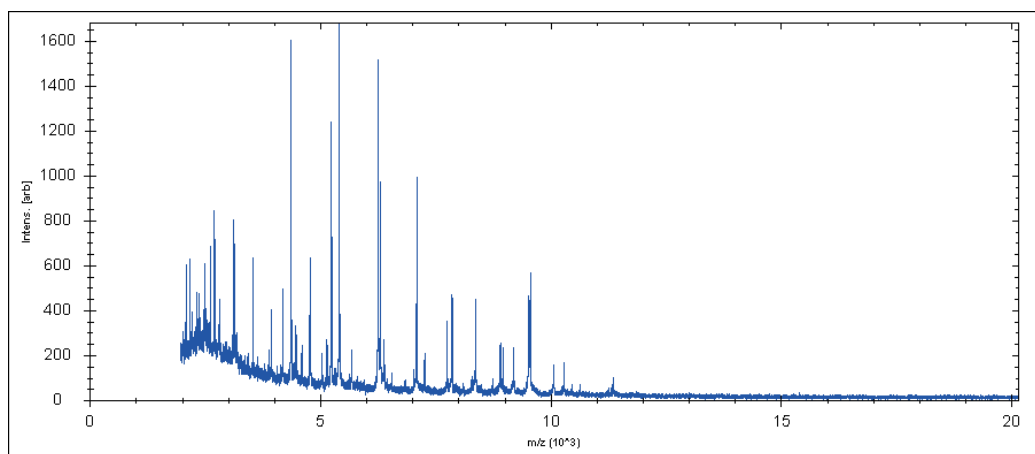FF371(*C. braakii*)

B

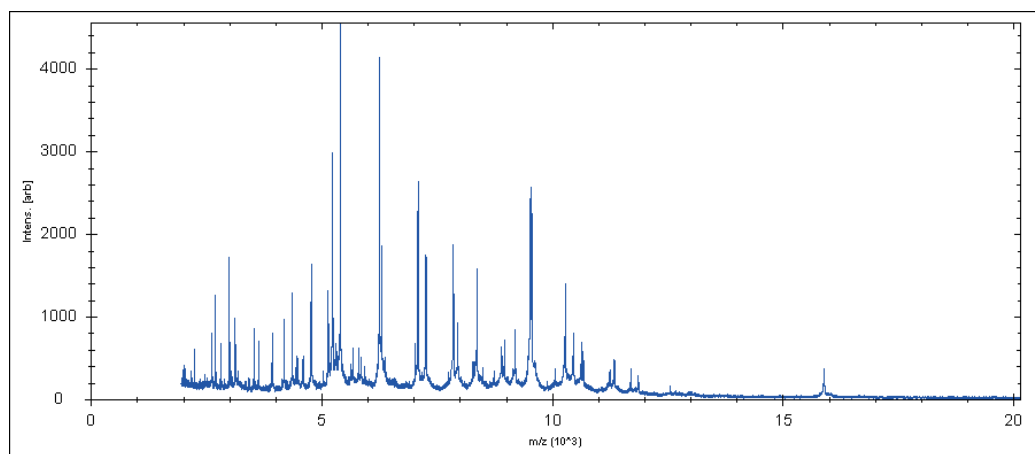FF414(*C. braakii*)

C

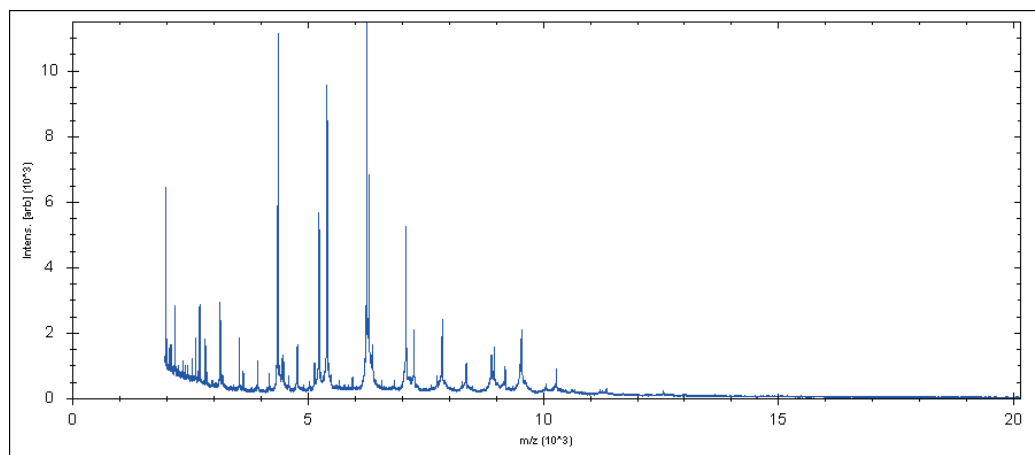FF423(*C. braakii*)

D

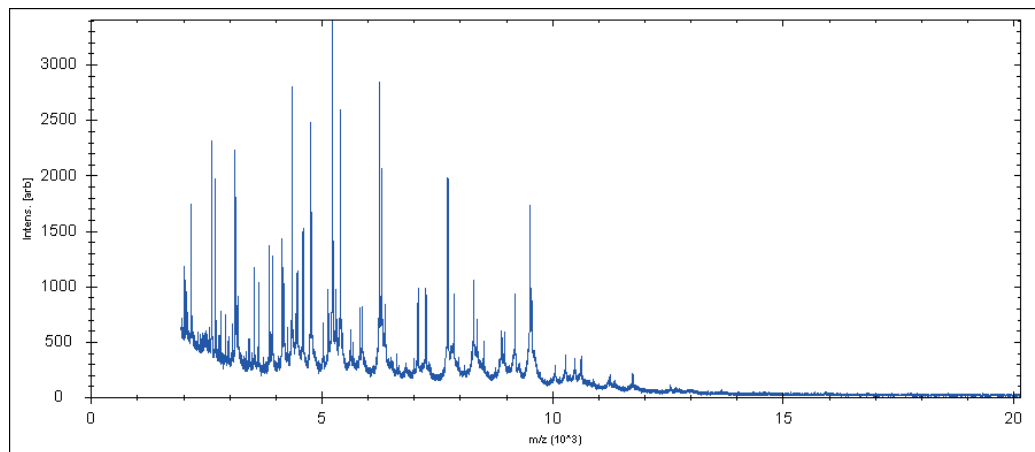FF141(*C. cronae*)
